# Supplementary material for: The Application of RGB, Multispectral, and Thermal Imagery to Document and Monitor Archaeological Sites in the Arctic: A Case Study from South Greenland
Source: MDPI journal article supplement (doi:10.3390/drones7020115), 2023-02-08
Supplement: s1 [file s1]

# The Application of RGB, Multispectral, and Thermal Imagery to Document and Monitor Archaeological Sites in the Arctic: A Case Study from South Greenland

Supporting material:

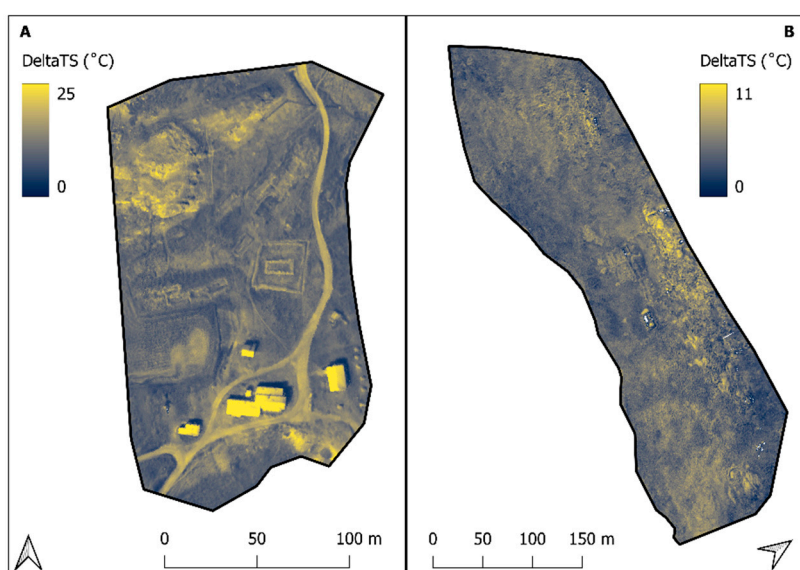

**Figure S1.** DeltaTS( $\delta$ TS)(°C) maps used for NDVI/ $\delta$ TS plot for TVDI calculation. (A) Qassiarsuk 2021. (B) Qaqortukuloq 2021. (Notice different ranges of  $\delta$ TS between images).

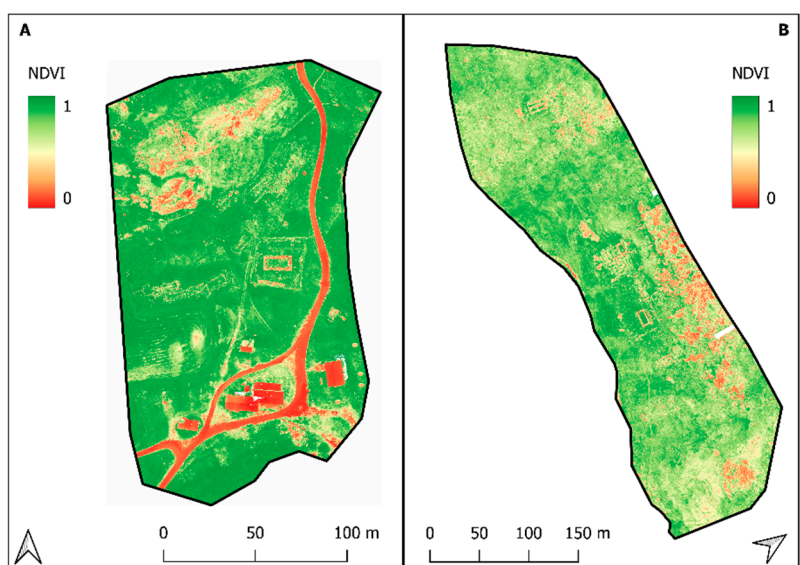

**Figure S2.** NDVI maps used for NDVI/ $\delta$ TS plot for TVDI calculation. (A) Qassiarsuk 2021. (B) Qaqortukuloq 2021.

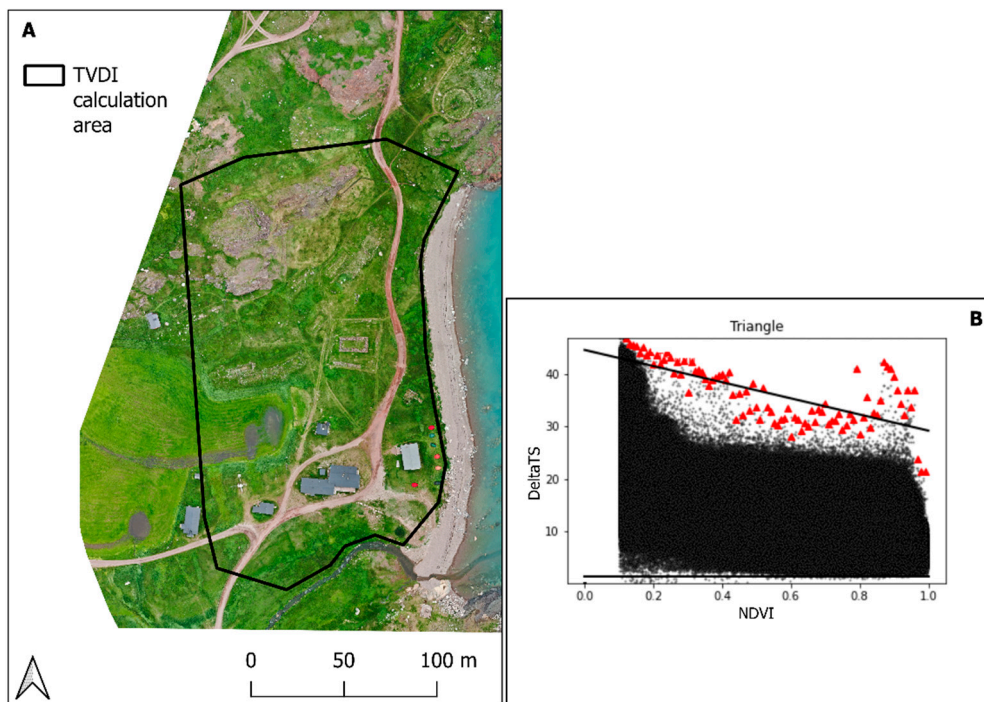

**Figure S3.** Qassiaruk 2021 TVDI dry- and wet-edge calculation. (A) TVDI calculation area. (B) NDVI/ $\delta$ TS scatterplot with pixels (21,923,044 pixels) from TVDI calculation area and dry-edge as a regression line defined by the maximum  $\delta$ TS across the NDVI range. Dry-edge:  $\delta$ TS =  $-15.42(\text{NDVI}) + 44.64$ ,  $r = -0.69$ . Wet-edge:  $\delta$ TS = 1.29. (pyTVDI).

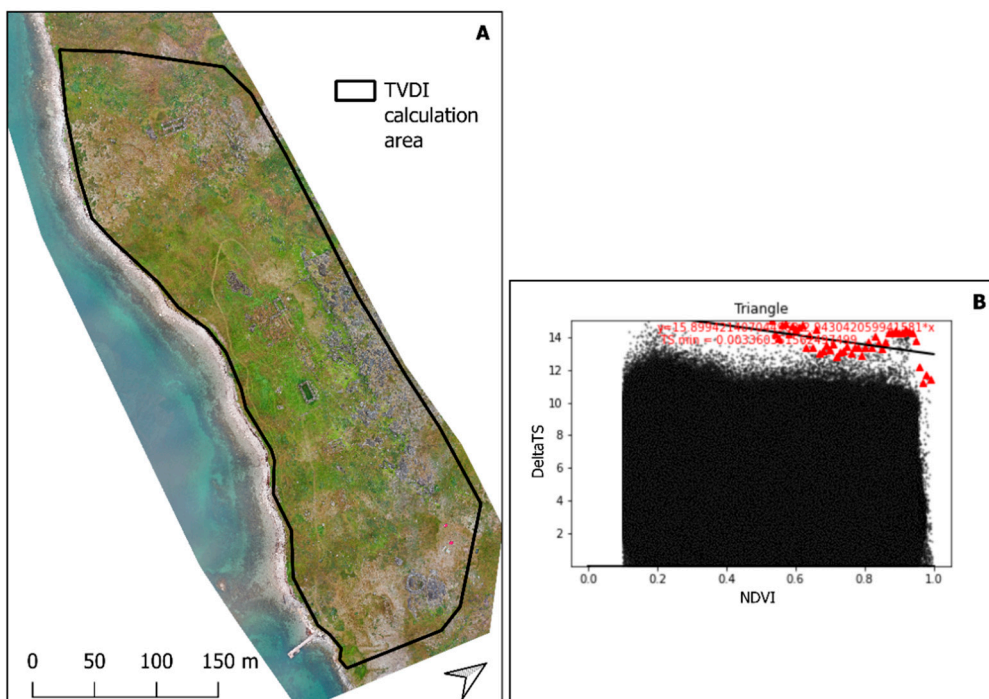

**Figure S4.** Qaortukuloq 2021 TVDI dry- and wet-edge calculation. (A) TVDI calculation area. (B) NDVI/ $\delta$ TS plot with pixels (105,928,938 pixels) from TVDI calculation area and dry-edge as a regression line defined by the maximum  $\delta$ TS across the NDVI range. Dry-edge:  $\delta$ TS =  $-2.94(\text{NDVI}) + 15.90$ ,  $r = -0.47$ . Wet-edge:  $\delta$ TS = 0.00. (pyTVDI).
